# Supplementary material
Source: Springer Nature journal article supplement (https://www.springermedizin.de/resource/supplementary/12885_2010_2812_MOESM2_ESM.pdf/9462064)

Low energy image

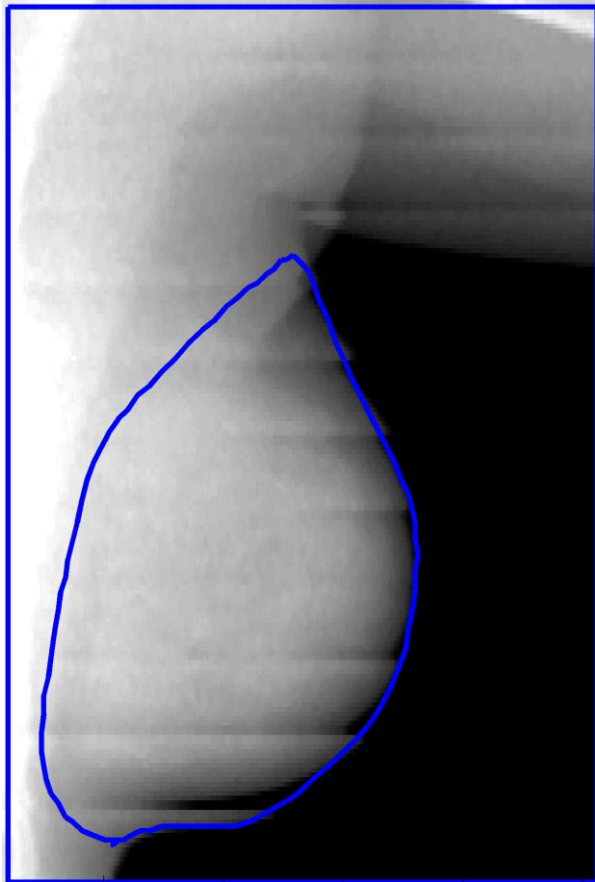

Density image

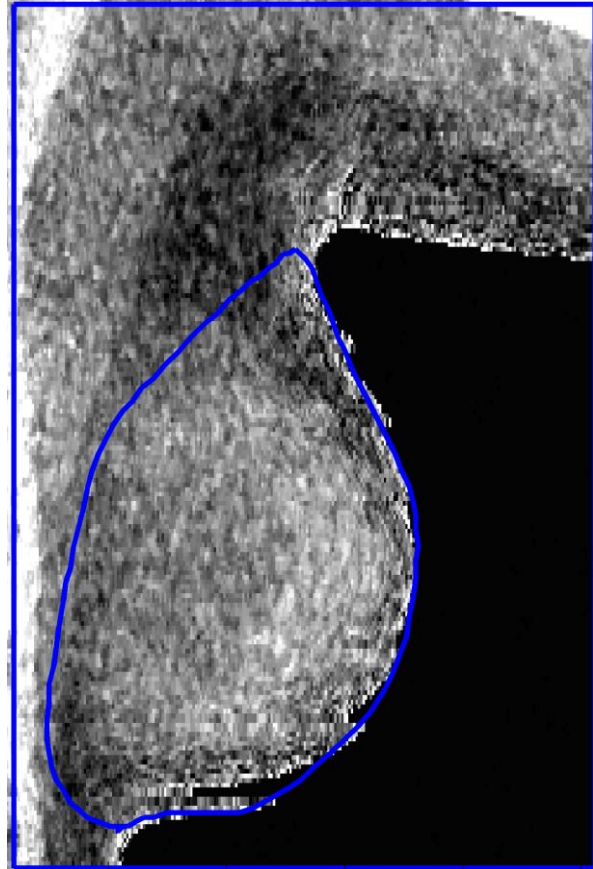

Supplement: MOESM2 [file 9462064]
